# Supplementary material for: The nonspecific effects of COVID-19 vaccination upon non-COVID-19 all-cause mortality (NCACM) in the population of England: Effects of age, sex, COVID-19 variant, vaccination history, and time in a real-world study from Jan-21 to May-23
Source: Preprints.org preprint supplement (doi:10.20944/preprints202401.0333.v1), 2024-01-04
Supplement: Supplementary file 2 [file supplementary]

**Supplementary materials S1.** Moving 52-week total deaths (relative to March 2020) for age bands 10–14 and 15–19, combined males and females in England and Wales. Also showing vaccination commencement dates with mRNA vaccines.
